# Supplementary material for: Facile synthesis of uniform h-BN nanocrystals and their application as a catalyst support towards the selective oxidation of benzyl alcohol
Source: Royal Society of Chemistry journal article supplement (doi:10.1039/c2ra21325g), 2012-01-01
Supplement: c2ra21325g.pdf [file c2ra21325g.pdf]

## Supplementary Information

### Facile synthesis of uniform *h*-BN nanocrystals and their application as catalyst support towards the selective oxidation of benzyl alcohol

Liancheng Wang<sup>b,c</sup>, Liuliu Shen<sup>a</sup>, Xiaohong Xu<sup>a</sup>, Liqiang Xu<sup>\*a</sup> and Yitai Qian<sup>ab</sup>

<sup>a</sup>Key Laboratory of Colloid and Interface Chemistry (Shandong University), Ministry of Education, Jinan 250100, PR China. E-mail: xulq@sdu.edu.cn; Fax: +86-531-8836-6280; Tel: +86-531-8836-6280.

<sup>b</sup>Hefei National Laboratory for Physical Science at Microscale and, Department of Chemistry, University of Science and Technology of China, Hefei, Anhui 230026, People's Republic of China. qianyt@sdu.edu.cn.

<sup>c</sup>Key laboratory of carbon materials, Institute of Coal Chemistry, Chinese academy of science, Taiyuan, 030001, Shanxi, People's Republic of China. Email: [wangle@sxicc.ac.cn](mailto:wangle@sxicc.ac.cn)

#### Preparation of Au/BN

The Au/BN material was prepared according to previous reports<sup>1-4</sup>. Briefly BN NCs were firstly hydrothermally treated by H<sub>2</sub>O<sub>2</sub> in 20-mL Teflon-lined stainless steel autoclave at 120 °C. Then, the HAuCl<sub>4</sub> solution with appropriate amount as well as urea (100 times as much as HAuCl<sub>4</sub>) was added into 60 mg BN NCs. After maintained at 80 °C for 20 hours, the solid powder was separated by centrifugation and washed for several times with deionized water. Finally, it was dried at 80 °C overnight, and calcined at 350 °C for 3 h.

#### The XRD(a), FT-IR (b) and Raman spectra (c) of S<sub>1</sub>

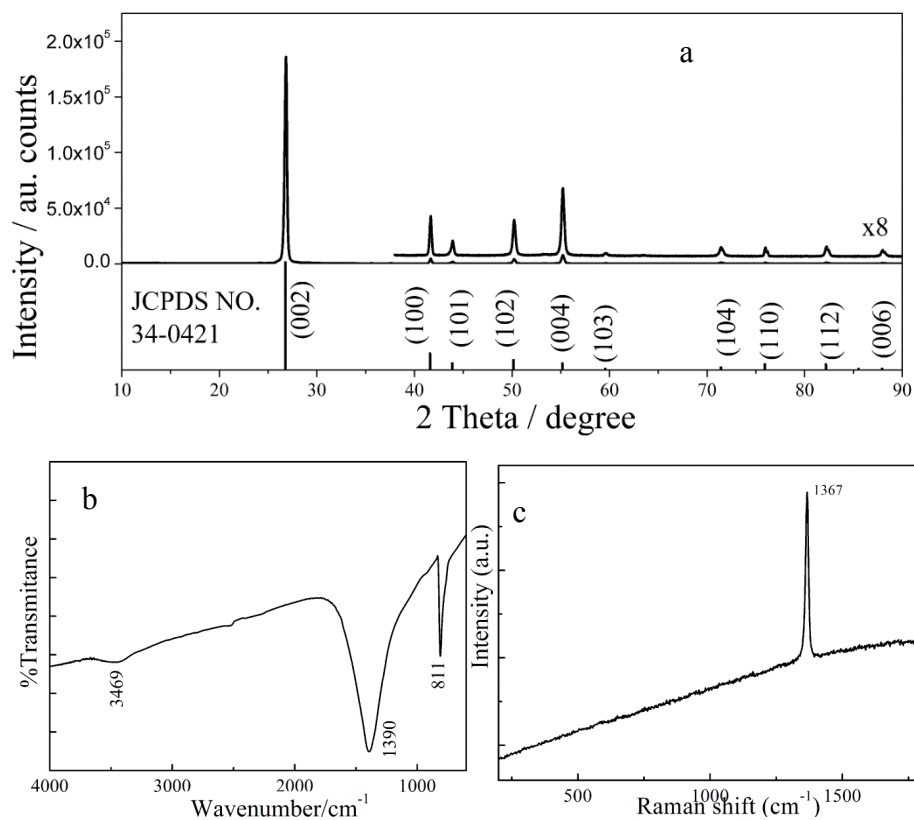

Fig. SI 1. The XRD pattern in the range of 10-90°(a), FT-IR (b) and Raman spectra (c) of S<sub>1</sub>. The FTIR spectrum of S<sub>1</sub> is shown in Fig. SI 1b. Two strong absorption bands locate at 1390 and 811 cm<sup>-1</sup> can be assigned to the in plane B–N stretching vibrations and out-of-plane B–N–B bending vibrations of BN, respectively.<sup>5</sup> The as-prepared S<sub>1</sub> was further examined by Raman spectrum. The single peak locates in 1365 cm<sup>-1</sup> corresponds to an in-plane vibration (*E*2g).

### SEM images of BN NCs

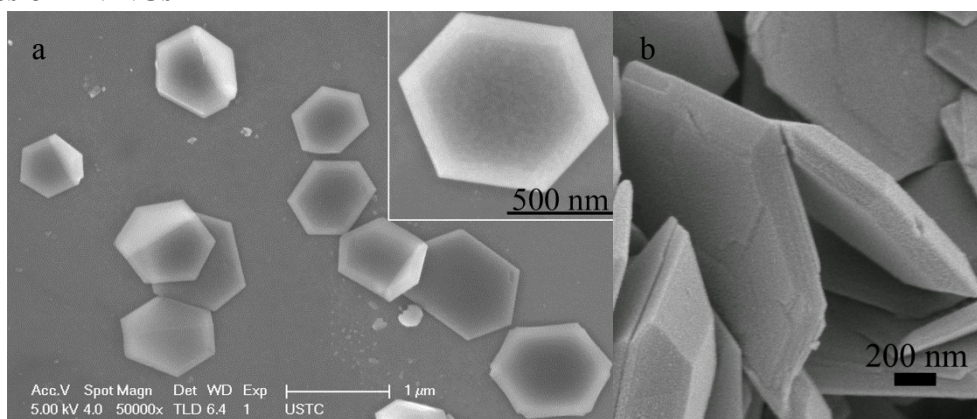

Fig. SI 2 SEM images of S<sub>1</sub>, top view(a) and side view (b).

### SEM images of the sample obtained at different temperatures.

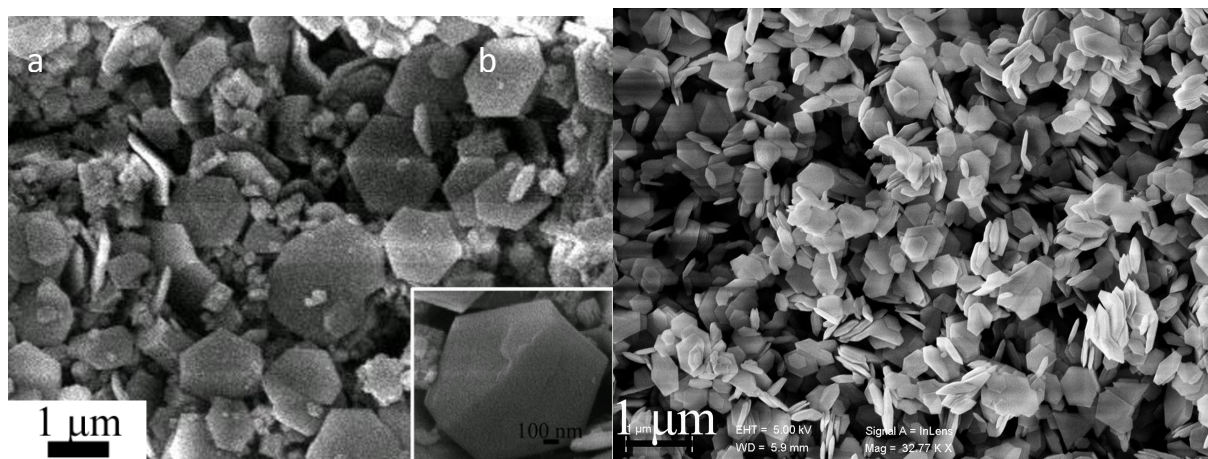

Fig. SI 3 SEM images of the sample obtained at 800 °C (a) and 730 °C (b).

#### References for SI

1. Zhi, C. Y.; Bando, Y.; Terao, T.; Tang, C. C.; Kuwahara, H.; Golberg, D., *Chem. Asia. J.* 2009, 4 (10), 1536-1540.
2. C. Zhi, Y. Bando, G. Shen, C. Tang and D. Golberg, *J. Nanosci. Nanotechnol.*, 2007, 7, 530-534.
3. L. Wang, C. Sun, L. Xu and Y. Qian, *Catal Sci Technol*, 2011, 1, 1119-1123. (c)L. Xu, S. Li, Y. Zhang and Y. Zhai, *Nanoscale*, 2012, 4, 4900-4915.
4. L. Delannoy, N. E. Hassan, A. Musi, N. N. LeTo, J. M. Krafft and C. Louis, *J. Phys. Chem. B*, 2006, 110, 22471-22478.
5. L. C. Wang, L. Q. Xu, C. H. Sun and Y. T. Qian, *J. Mater. Chem.*, 2009, 19, 1989-1994.
